# Supplementary material for: The Appropriate Dose of Remimazolam Combined with Remifentanil in Anesthesia for Gastroscopy
Source: Research Square preprint supplement (doi:10.21203/rs.3.rs-710800/v1), 2021-09-28
Supplement: Supplementary file 1 [file 5aa8430cd78de5824aaa0df6.docx]

**Table1.Sedation Assessment Scores**

| Modified Observer’s Assessment of Alertness/Sedation | |
| --- | --- |
| Response | Score level |
| Responds readily to name spoken in normal tone | 5(alert) |
| Lethargic response to name spoken in normal tone | 4 |
| Responds only after name is called loudly or repeatedly | 3 |
| Responds only after mild prodding or shaking | 2 |
| Does not respond to mild prodding or shaking | 1 |
| Does not respond to noxious stimulation | 0 |

**Table 2** Baseline characteristics of the patients (n=80)

| Characteristic | W1 group | W2 group | F1 group | F2 group | C group |
| --- | --- | --- | --- | --- | --- |
| Gender (M/F) | 42/38 | 41/39 | 43/37 | 49/31 | 44/36 |
| Age (years) | 49.911.9 | 47.513.1 | 11.0 | 49.210.5 | 50.310.7 |
| Weight (kg) | 67.56.8 | 67.510.5 | 66.79.7 | 69.712.5 | 67.18.5 |
| Height (cm) | 168.77.7 | 168.26.9 | 167.37.5 | 167.08.6 | 167.77.7 |
| BMI (kg/m2） | 23.72.0 | 23.82.8 | 23.82.7 | 24.82.8 | 23.82.5 |
| Duration of gastroscope (min) | 5.32.7 | 5.63.6 | 6.82.2 | 6.53.5 | 6.8 |
| HR (times/minute) | 81.815.0 | 76.911.8 | 81.913.8 | 76.814.7 | 14 |
| MAP (mmHg) | 10212 | 10112 | 10713 | 10715 | 10514 |
| SPO2（%） | 99.41.0 | 99.21.1 | 98.91.0 | 99.21.1 | 99.40.8 |

| Table 3 Anaesthesia effects, recovery and complications in each group (‾X±s, n=80) | | | | | |
| --- | --- | --- | --- | --- | --- |
|  | C group | W1 group | W2 group | F1 group | F2 group |
| success rate no. (%) | 65（81） | 57（71）Δ | 77（96） | 16（20）▲ | 53(66) |
| Awakening time (minute) | 11.2 | 9.32.9 | 10.13.3 | 9.03.1 | 9.7.5 |
| Discharge time (minute) | 30.0 | 31.38.2 | 35.69.8 | 29.29.1 | 30.99.5 |
| hiccup no. (%) | 6（7.5） | 13（16） | 3（4） | 3（4） | 10（12.5） |
| Respiratory inhibition no. (%) | 13（16） | 10（12.5） | 10（12.5） | 0（0） | 10（12.5） |
| Cough no. (%) | 13（16） | 3（4） | 0（0） | 48（60） | 3（4） |
| Injection pain no. (%) | 48（60） | 3（4）* | 0（0）* | 0（0）* | 0（0）* |
| Note: Compared with W2 group, Δ*P*<0.05; compared with F2 group, ▲*P*<0.05; compared with C group, **P*<0.05 | | | | | |
